# Supplementary material for: A promising bioelectrochemical reactor integrating membrane distillation and microbial fuel cell for dual advantages of power generation and water recovery
Source: Royal Society of Chemistry journal article supplement (doi:10.1039/d0ew00379d), 2020-01-01
Supplement: d0ew00379d1.pdf [file d0ew00379d1.pdf]

### SUPPLEMENTARY DATA

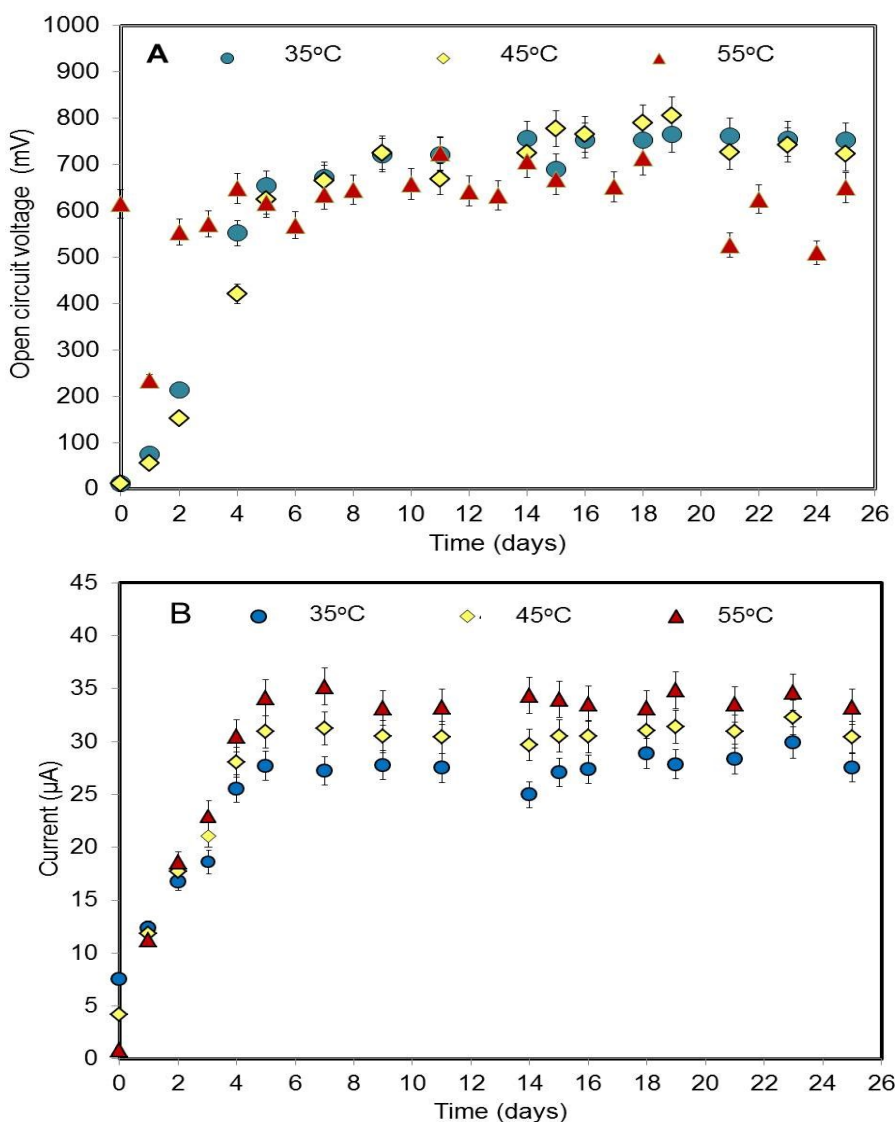

**Fig. S1.** Open circuit voltage (OCV) (A) and current (B) of MFCs for inoculated stage at different temperatures of 35, 45, and 55°C at start-up stage (CEM membrane as separator, carbon graphite mesh anode, and carbon graphite plate cathode).

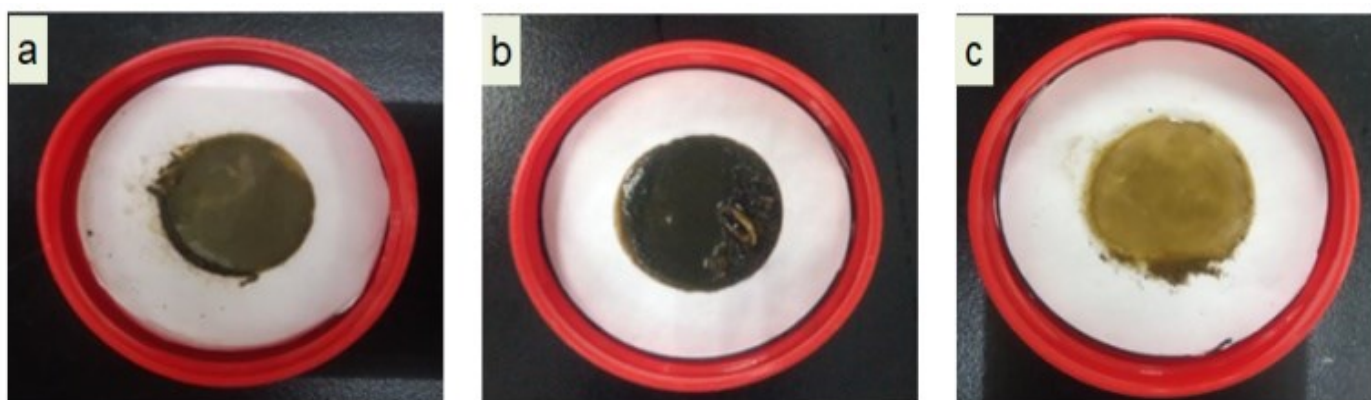

**Fig. S2.** Actual photos of biofilm attached on surface of PTFE membranes at 35°C (a), 45°C (b) and 55°C (c).
